# Supplementary material for: A hyper-reflective cholesteric liquid crystal polymer network with double layers
Source: Royal Society of Chemistry journal article supplement (doi:10.1039/d3nj03217e), 2023-01-01
Supplement: d3nj03217e1.pdf [file d3nj03217e1.pdf]

## **Hyper-reflective cholesteric liquid crystal polymer network with double layers †**

Ming Zhang,<sup>a</sup> Jinghua Zhao,<sup>a</sup> Zhigang Yao,<sup>b\*</sup> Wei Liu,<sup>a</sup> Yi Li<sup>a</sup> and Yonggang Yang<sup>a\*</sup>

<sup>a</sup>State and Local Joint Engineering Laboratory for Novel Functional Polymeric Materials, Department of Polymer Science and Engineering, College of Chemistry, Chemical Engineering and Materials Science, Soochow University, Suzhou 215123, China. Email: Y. Yang, [ygyang@suda.edu.cn](mailto:ygyang@suda.edu.cn).

<sup>b</sup>Analysis and Testing Center, Soochow University, Suzhou 215123, China. Email: Z. Yao, [zhgyao@suda.edu.cn](mailto:zhgyao@suda.edu.cn).

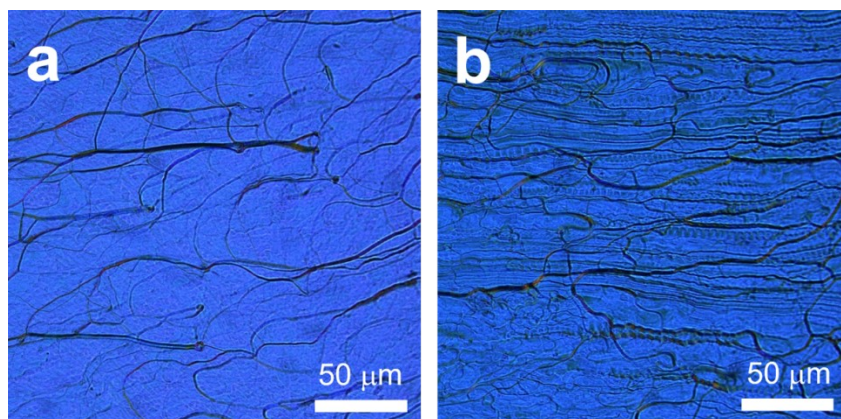

**Fig. S1** POM images of (a) the LC242/S5011/907 (w/w/w, 94.5/2.5/3) mixture and (b) the LC242/CA-iso/907 (92.17/4.83/3) mixture taken at 80 °C during the cooling process.

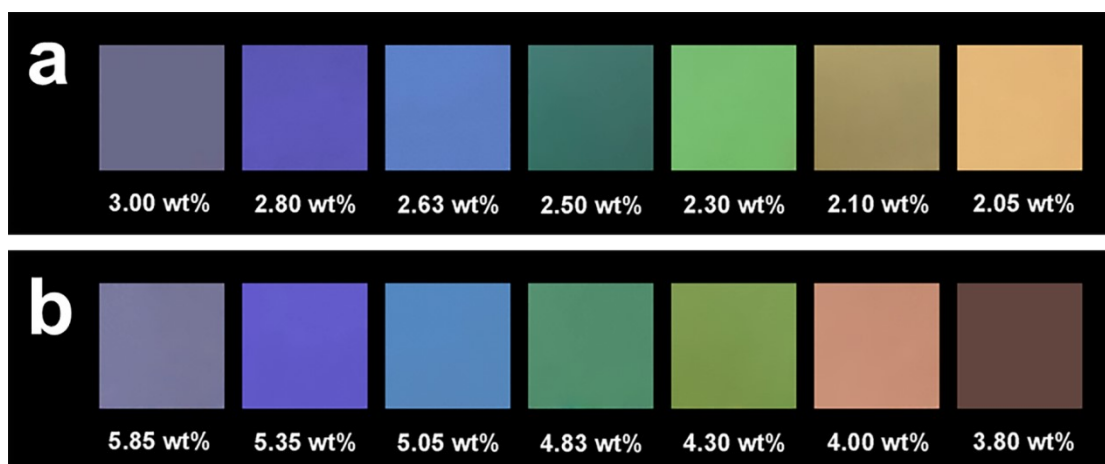

**Fig. S2** Photographs of the single-layered CLCN films prepared under different concentrations of (a) *S5011* and (b) *CA-iso*.

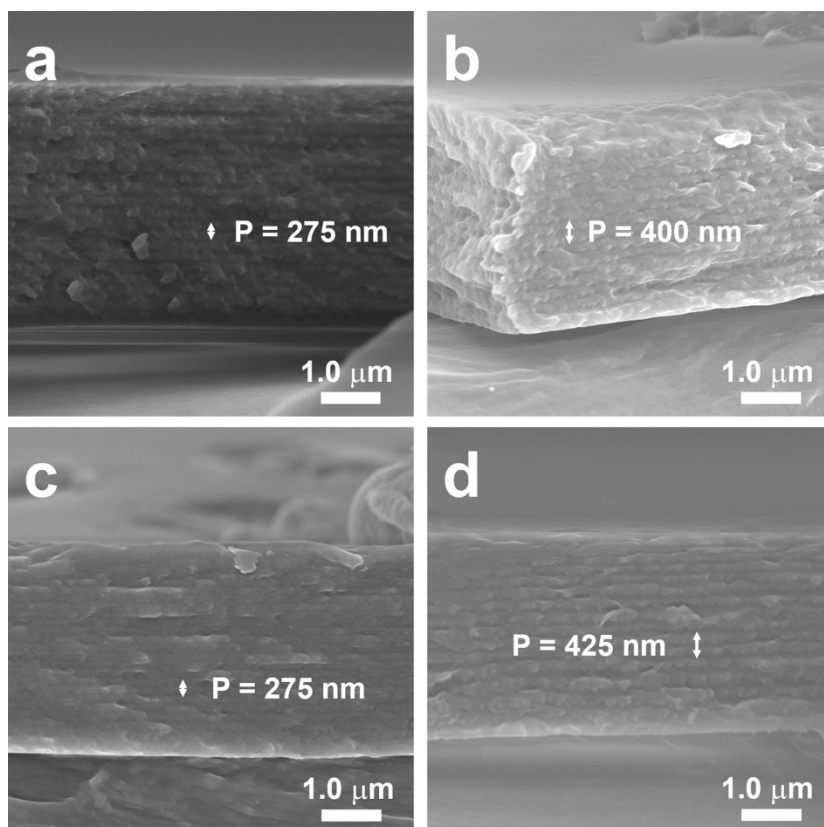

**Fig. S3** Cross-sectional FESEM images of the single-layered CLCN films prepared using (a) 3.00 wt% of *S5011*, (b) 2.05 wt% of *S5011*, (c) 5.85 wt% of *CA-iso* and (d) 3.80 wt% of *CA-iso*, respectively.

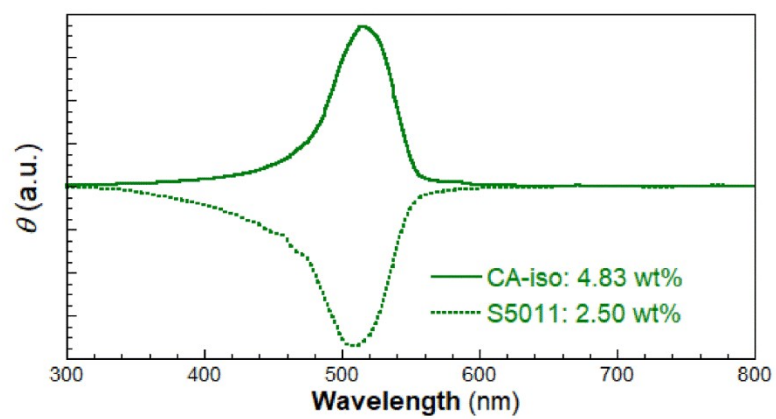

**Fig. S4** DRCD spectra of the single-layered CLCN films prepared using *S5011* and *CA-iso*, respectively.

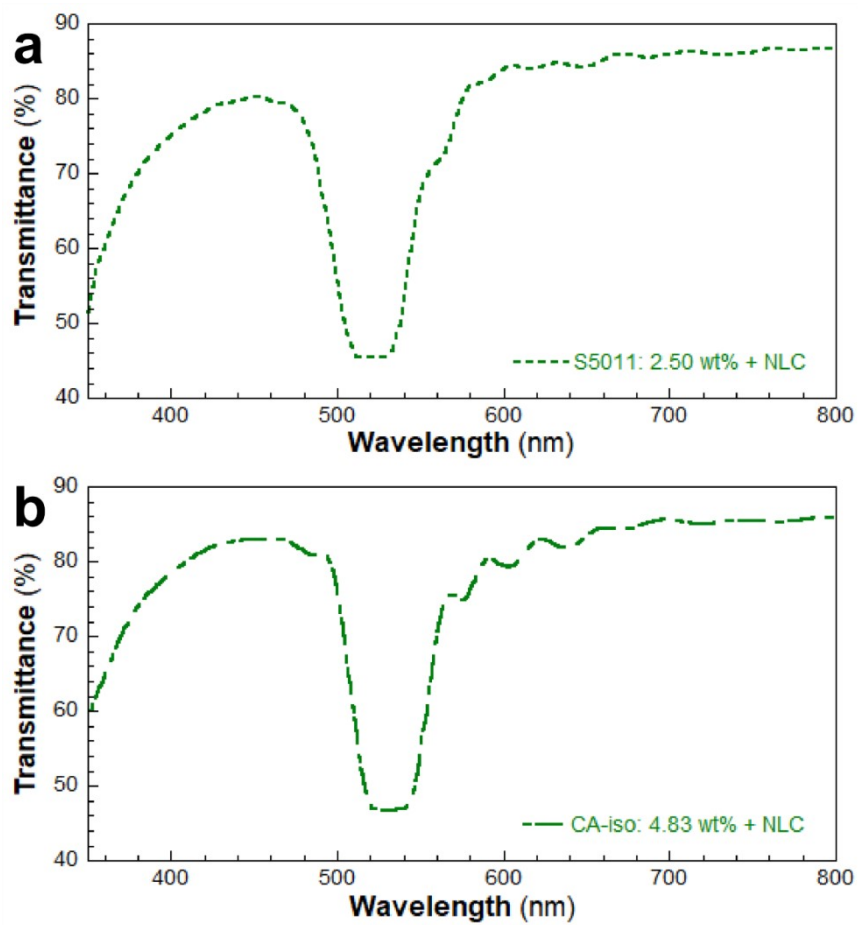

**Fig. S5** UV-*vis* spectra of the double-layered CLCN films prepared using (a) a left-handed CLC mixture and the NLC one and (b) a right-handed CLC mixture and the NLC one.

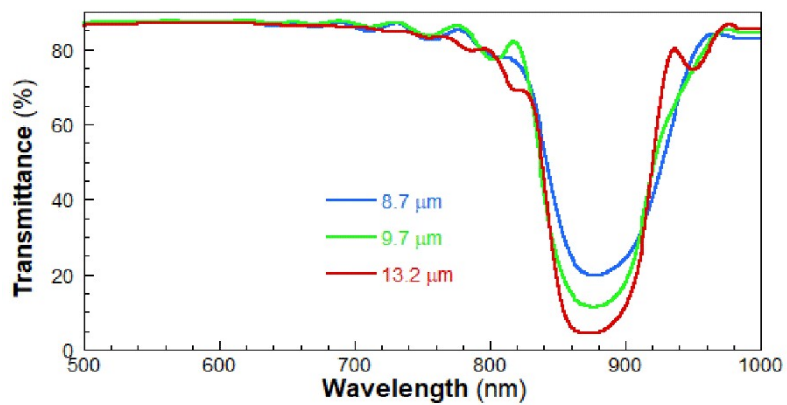

**Fig. S6** UV-*vis* spectra of the double-layered CLCN films with different thicknesses.

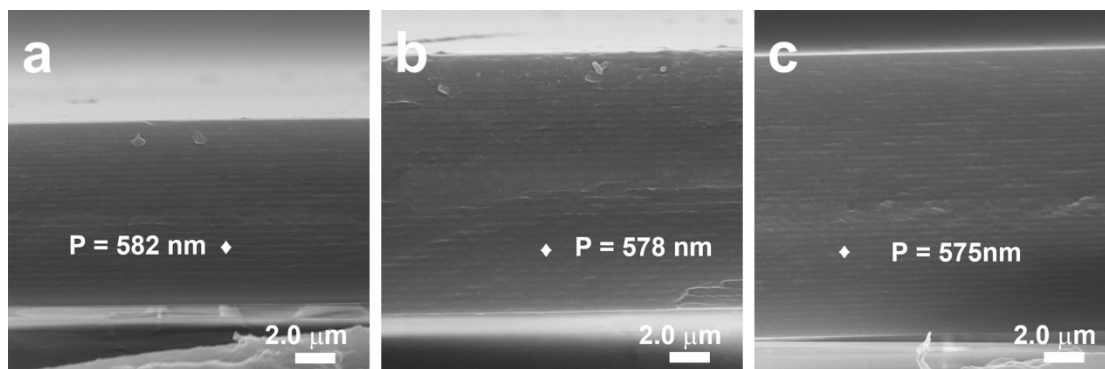

**Fig. S7** Cross-sectional FESEM images of the double-layered CLCN films with different thicknesses. (a) 8.7  $\mu\text{m}$ , (b) 9.7  $\mu\text{m}$  and (c) 13.2  $\mu\text{m}$ .



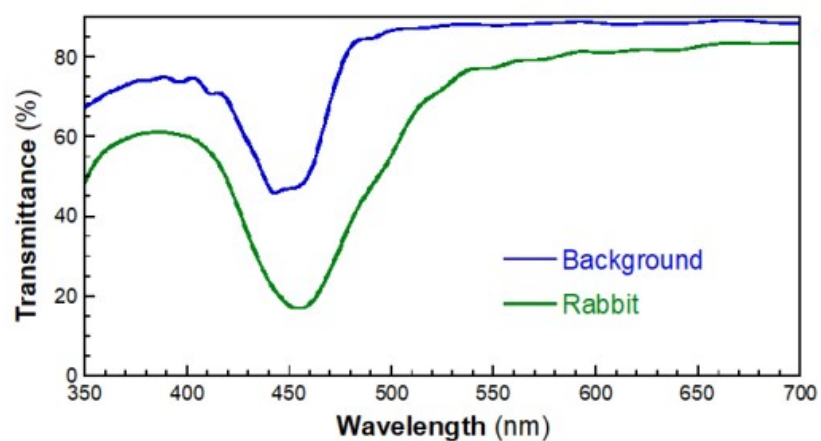

**Fig. S8** UV-*vis* spectra of the rabbit area and the background.

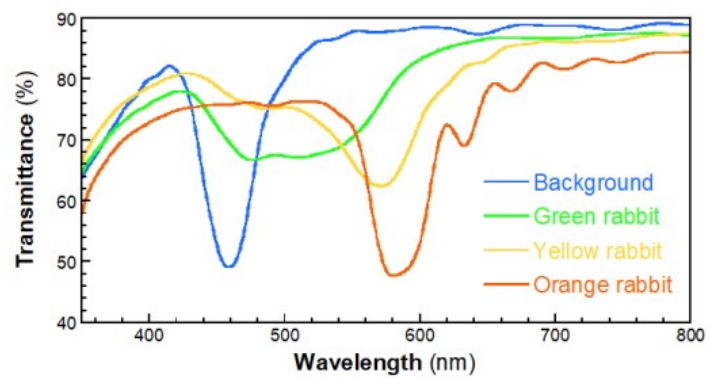

**Fig. S9** UV-*vis* spectra of the rabbit areas and the background.

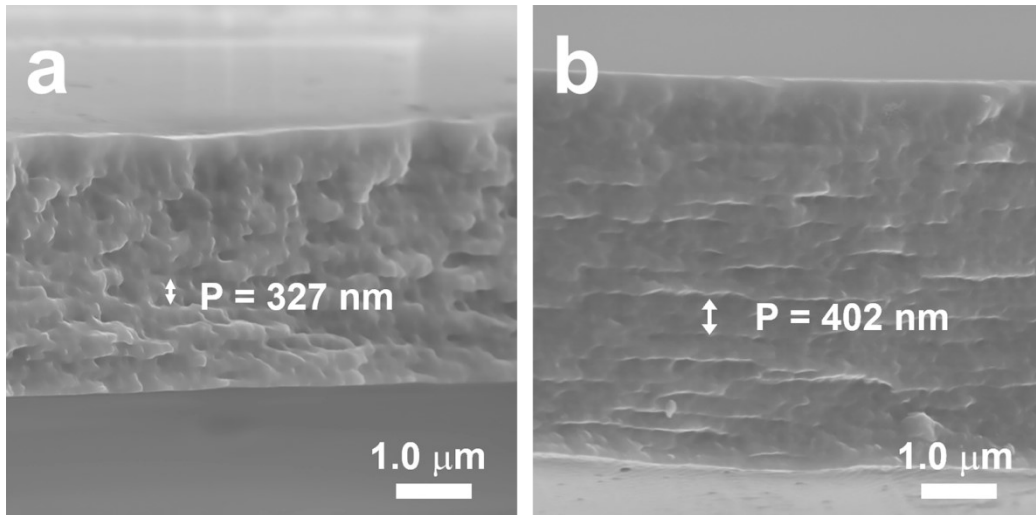

**Fig. S10** Cross-sectional FESEM images of (a) the background and (b) the blue rabbit area.
